# Supplementary material
Source: publisher figshare collection journal article supplement (https://asha.figshare.com/articles/dataset/_/24112800)
Supplement: Supplementary file 1 [file 2]

## Sheet: Sheet1
Supplemental material, Lauretta et al., “An Investigation of Barriers and Enablers for Genetics in Speech-Language Pathology Explored Through a Case Study of Childhood Apraxia of Speech,” JSLHR, https://doi.org/10.1044/2023_JSLHR-22-00714
Supplemental Material S4. Complete list of barriers and associated enablers.
Target behavior 1. Pre-referral stage: Identifying children who are suitable for referral for genetic consultation
Grouped barriers	TDF domain	Exemplar quotes	Intuitive enablers	Exemplar quotes	Hypothetical enablers	Exemplar quotes
Relevance to speech-language pathology practice and outcomes	Beliefs about consequences, Optimism	… because that’s the thing, like you treat what’s going on. If it’s a deletion or it’s a substitution or whatever, it doesn’t, that does not make any difference to me about how I treat the child. (P3)	Seeing value in genetic diagnosis for speech-language pathology practice or outcomes	So, that's kind of, where it comes into it a bit more, when someone’s got a confirmed diagnosis, what does this specific diagnosis mean, and what things do I need to consider when working with them. (P5)	Hope for more understanding about the genetics of speech disorders	I think it could be really interesting with, as I guess, we find out more about some of the specific genes involved that result in speech and language difficulties. I've kind of seen this happen a little bit in the hearing-impaired space. (P11)
		… because I guess I can’t change the kid’s genetic makeup, but hopefully I can affect some change in their functional communication skills. (P4)		[A genetic diagnosis] just enables you to get a better grasp on what you're dealing with in terms of, you know, so it may not change the course of his speech and language presentation, but it may give you an indication of his learning potential, or factors that may impact on that (P10)
		The genetic disorder doesn’t actually change my speech pathology management as such. (P7)	Seeing value in genetic diagnosis as a means to access services or funding	It might help him in terms of him being deemed eligible for services. Like, as a really simplistic thing, it might mean that he is able to access speech therapy services at school, which he wouldn't otherwise be able to access (P4)
		I would have definitely said something like, you know, [a genetic diagnosis] helps us with a prognosis, but having seen even all the stuff that I’ve seen recently, of those children that are now getting diagnosed with CAS that might be part of a genome sequence, still, the outcome very much depends on where that child is, how much therapy they have, and you know, two children with the same geneti…		But to be truthful with you, in terms of intervention, linking them into funding is massive. We talk about funding giving them choices. We’re surprised at how many kids’ NDIS plans lack the rigor of a genetic diagnosis... And when they’re approaching that 7-year-plus crossover, that’s sometimes a good time to say it may be worthwhile looking at this more thoroughly because if you have a genetic d…
SLPs' confidence in genetic and genomic practice	Beliefs about capabilities		Supervision	I think that being able to just talk something through, whether that's with a colleague or a formal supervision arrangement, I think that's invaluable in terms of building the confidence. (P3)	Training through specialist services or tertiary degrees
		I would need to feel really, really confident in like, that I’m sending them to do the right thing here. (P1)	Level of experience with specialist areas of practice including genetics and genomics	For me personally, pretty confident, because of my clinical experience, longevity in my work, comparisons across children. (P2)		And if there was a clinic that was really, you know like, for example, [hospital], can you put on an info night, a parents and allied health info night? That kind of thing would make me feel a lot more confident. (P1)
		I feel like I just don’t understand it very well at all, and that I don’t really know what this is going to mean and like, I might know a bit about specific conditions that I’ve come across, but I still don’t know	Rationale for genomic healthcare or support	I would feel confident in asking, I always do for my case histories. It’s never been a problem, and I usually phrase it in that way, like it helps me differentially diagnose what’s potentially going on here, and what we need to do. (P1)		I think there's probably some additional training needed so that we really understand what [genetics] means and how to do that referral and that sort of thing, but I think it could quite easily be implemented, we just need it in place and need to feel prepared for it. (P5)
		very much about genetics and how it might, yeah, come into play with what I’m doing, and also what things to look out for that might be warranting a genetics referral. (P5)	Working within a multidisciplinary team and/or strong working relationships with other HCPs	So if I’ve got a child that I’m a little bit hesitant about, I’ll get a team member to double-check. (P2)		If [genetics] was something that was more integrated into a degree in the first place, then that would obviously be an easier way to do it, rather than trying to kind of, skill up later on. (P6)
			Experiencing success with genetics-related tasks	For other [referrals] I've been pretty successful with that in the past, so I feel like I have done the research and really know what's needed and what's warranted for this kind of referral. (P5)
Level of experience with genetics and genomics	Knowledge	I think, unless it’s similar to a condition that I’ve already come across and I’m a bit more familiar with, I wouldn’t really be thinking genetic causes. (P5)	Supervision	I think it's really important to make sure that you have good clinical supervision and support in that process, because it's something that, um, you really need to develop those skills through practice and experience with things like taking case histories. (P11)	No hypothetical enablers identified
		In terms of like, experience with those people, you know, I think it’s only fair that I made it clear that I haven’t kind of, seen [a person with the genetic condition] myself. (P8)	Exposure to genetics and genomics through particular practice settings or involvement in research	I've always worked in roles where there have, I've worked with kids with different genetic conditions... So, I was sitting in in clinics and getting a bit of an idea about what to look for and what kind of, dysmorphology you can come across. (P7)
		Really, at the moment, [identifying suitable children] is probably more dependent on your experience, if you just happen to have seen a couple of kids where, like, I’ve seen a couple of kids with particular syndromes, but really, that’s not the way it should be. (P10)		I don't think however, I would have considered genetics as much as I do now, had I not have had the exposure at [research institute], through, you know, learning more. So, before I started my PhD, in my clinical work, I don't think I would have considered genetics as much as I do now. (P12)
Possible outcomes of genetic testing	Optimism	However, what are the likelihoods of finding something [genetic] that’s linked to CAS? Quite low. (P2)	No intuitive enablers identified		Hope for more understanding about the genetics of speech disorders	It’s one of those things that often get asked, you know, so why has my child got speech and language delays, and often the answer is we don't know. And I think if, that's right, if the genetic testing was more prevalent, maybe we would know a little bit more often. (P4)
		I guess so many the kids that we see, there isn't a diagnosis, so it's just like well, we just, this is what they're presenting with, this is what their skills are, and this is what we'd like them to work on, so that's, that tends to be the focus I guess. (P4)
		If you take [him] as point blank, just having language disorder, speech sound disorder with CAS, and some potential cognitive delays, that's half the kids on my caseload, and you know, lots of them have had genetic testing and not found anything (P7)
Clinical decision making	Social/Professional role and identity, Skills, Intentions		Awareness of characteristics specific to a particular speech presentation	That would be a decision for his parents to choose based primarily on his CAS. So, CAS would be enough of a rationale for having the [genetic] testing done. (P2)	Structured methods to identify characteristics of children suitable for genetic consultation (e.g. checklists)	In that kind of, you know, private clinic setting, I imagine if there were kind of, a standard like, almost like a checklist of things to consider when people present to the clinic, that could kind of, jog my thinking more. (P8)
		I think the focus has generally been on like, how do we support this kid when they turn up, rather than how do we find out what the cause was, or, yeah, the diagnostic sort of side of things. (P4)		He's been given a diagnosis of CAS, and we know that that is really closely linked with a range of different genetic conditions (P7)
		Whereas if it's, if it’s um, a lisp or something, I might be less inclined, I might spend less time thinking about where it's coming from, I suppose, and putting less emphasis on something that's a little bit more mild like that. (P12)	Awareness of factors which might indicate presence of a genetic condition	Unless there was something else that was making me think, you know, maybe there's an underlying syndrome. So if there were some, like the child looked like they had some of those syndromic features, so some facial differences, things like that, that would potentially flag me in that direction (P4)
				So, like, if those, if he had you know, some facial asymmetry or abnormalities, or some other kind of, social pragmatic challenges, or if it comes up with mum and dad that like in the family history, I would be considering more kind of genetic testing. (P8)
Genetics and genomics as a priority in speech-language pathology clinical practice	Memory, attention, and decision-making processes, Goals	I haven't really thought that much about genetics, unless someone has already come to me with a diagnosis, um, then I obviously look into it further (P6)	Family motivation	Sometimes [parents] come and they’re like, something's not right, we need to work out what's causing this, we need to fix it, we need to you know, they’re really like, keen to go on that journey. (P4)	No hypothetical enablers identified
		In standard kind of, private clinical practice, you probably wouldn't come across a lot of genetic conditions, so it probably wouldn't be at the forefront in my mind (P8)
		I think perhaps it's [genetics] just not as front of mind … and it's more, sort of, about the speech, the clinical speech features that might be, speech pathology features that might be observed, that would be discussed. (P12)
Target behavior 2. Referral stage: Referring for genetic consulation
Grouped barriers	TDF domain	Exemplar quotes	Intuitive enablers	Exemplar quotes	Hypothetical enablers	Exemplar quotes
Awareness of processes within genetics services	Skills	I’m not sure, like, what the rules are about even putting in referrals like that, but I know for certain things they need to come directly from a doctor or from a paediatrician, so I’m assuming it’s probably the same for a referral for genetic testing. (P5)	Capacity to obtain support from other HCPs	I would probably be calling up the paediatrician, or like, you know, getting in touch with their medical service and just say, these are my thoughts and corroborating within a team, do we think we’re all on the same track here? And I’d probably be handballing to the [paediatrician] for referral information as well. (P1)	Access to information regarding genetics referral processes	I think it would be helpful to kind of, know first of all, what would be needed before you could make a referral, so like, what kind of evidence would be needed before it would be considered, what questions to ask, what to do. (P5)
		I also don’t know 100% what genetic testing involves and how kind of, invasive it is, and obviously if it’s something that is not necessarily required, whether that’s kind of, unnecessary trauma. (P6)				I think a lot of people would appreciate having more accessible information and kind of, guidelines and, yeah. I'm all for making things easier and better. (P6)
Connection to genetics services	Social influences	At this point, I kind of, don’t have that relationship [with paediatricians or genetics services]. (P6)	Confidence to access genetics services or information about genetics services	Sometimes I'll actually just research myself like, just looking to Google, how do I put in a referral for genetics, to a genetic counsellor, or how do I put in a referral to a paediatrician. (P5)	Genetic counselling support for SLPs	I think knowing more about the [genetics] services that happen within our area and having more interaction with them would help, because it tends to be a bit of a black hole when people go off there and whatever. (P9)
		So it’s like, having kind of a focal point, yeah, so like where to, like I’d like to know who to ask [about making a referral] I suppose. (P8)	Access to SLP experts in the field of genetics or specialist services/clinics	And then our referrals to [hospital] have been good, because once they get there, they’ve got as far as an associated cognitive assessment, or they’ve seen a geneticist. (P2)	Specialist SLPs embedded in clinical genetics teams	That would be amazing if there were [speech pathologists] attached to the genetic testing clinics, who that was, that was their job, that would be brilliant. (P4)
		[When working in the hospital setting] you’ve got those closer ties with specialists, you’re more closely part of it … versus just sending off a referral letter and, you know, at some point you might get a letter back saying, yes, we’ve made this diagnosis. (P11)		[I'd go to] maybe like Luke’s genetic service, or other speech pathologists who might have had some more experience in the area. (P6)		It would be nice to have some speech pathologists, like in a lot of areas now that have a diagnostic team, for things like autism or something like that, it would be nice for some different professionals or speech pathologists or even occupational therapists, or whatever, that could be part of a genetics team, even if it's a tertiary part of it, where they just sort of, send information and that'…
Contextual factors (including practice setting, time)	Environmental context and resources	I would also, probably again in my own time, have to factor in some time to I guess, learn a bit more about genetics to include a little bit more of a justification as to why I think the referral might be appropriate. (P6)	Location, proximity, and ease of access to other HCPs	In my service, there's three paediatricians that we work really closely with, so I know them really well, and they're like, around the corner, so I can just pop in and say, I saw this kid, I think you should see them too. (P7)	No hypothetical enablers identified
		If you’re in a sole discipline private practice, that can be really hard because there’s, I don’t know, they can be more focused on billable hours and things that you can’t bill for being like, lower down the line in terms of management. (P7)		So, if someone's just in the room next door, you can kind of, walk next door and say, oh, I've just seen a kid who's got these features, I'm not sure, should I refer? (P12)
		But if [the family] is in an area that I’m less familiar with, then it probably would impact, because I’d have to take the time to find out who would be a good paediatrician to refer them to. (P12)	Streamlined referral processes within services (e.g. checklists)	In my work setting, it was very straightforward, because we were all part of the one organisation and the one team, so it was very straightforward, it was literally a tick-a-box and, you know, and some referral information, and a discussion to support that. If needed, we'd have a case conference meeting. (P10)
Support from and connection with other healthcare professionals	Social influences	I guess I don’t have a network of doctors in the area that I would say, take this letter to this particular doctor, they know a lot more about this area [genetics]. (P6)	Working within a multidisciplinary team and/or strong working relationships with other HCPs	I was lucky enough to work in a team where, because we had very strong relationships with the [paediatricians], we would just err on the side of caution and refer children where there was any indication of anything in addition to the child's speech and language presentation. (P10)	No hypothetical enablers identified
		So, I guess, because I didn't refer directly to the geneticists, then I wouldn't have that established relationship with them, though, it would just be about ease of contact familiarity, whether they're already part of the team. (P10)
		Whereas if I'm in a private practice setting, I'm sitting there, kind of, I've seen the client, they’ve left, I've got no one I can just pop in, no expert I can just ask, so it might end up just not happening, or it's just less of a focus. (P12)	Child's current care team	I think if it's, assuming that it's a child, I want to kind of, know where their paediatrician is at with that, or if they have one. If not, potentially they need to be referred to one. (P8)
SLPs' perception of medical hierarchy	Social influences	Like for other services you know, sometimes they need that conversation with the high-ranking health professional, rather than just accepting anyone. So I don’t know whether it’s an exclusive entry thing, or whether just anyone can present and get genetic testing done. (P1)	Reciprocal relationship with medical professionals	I think doctors who understand that and have a bit more kind of, respect for speech pathology, and understanding of what we can do, and how we can help, I think is really good. (P3)	No hypothetical enablers identified
		There is a bit of a hierarchy in the medical system … there are times when you, kind of, get gaslit by other medical professionals which is really frustrating, because often you’ve put in a lot of work around this with the family and then to have it get dismissed by the doctor makes it really difficult. (P3)		So definitely when there's like, clear pathways and good connections between the speech pathologist, the GP, and the paediatrician, that's when it seems to work best. (P4)
Families' perceptions of genetics and genomics	Skills	It can be more of a process to work with families around accepting, or even considering, that there might be something underlying. (P4)	Presenting options for families	I just kind of, make sure that the families are aware of 'this is what the pathways are, and this is what, you know, you basically can decide which way you want to go'. (P11)	No hypothetical enablers identified
		I think sometimes it’s a bit difficult to kind of, flag [with families] that no, we need to start exploring this now not later, because [the child] needs the support now. (P5)
		But it seems to be quite a long process to talk parents through that issue, because even as clinicians, if we're thinking about [a genetic condition], sometimes it's a big step for parents to actually take that in. So, it's very often a matter of months talking to parents before they're willing to go down that stage. (P9)
Target behaviour 3. Post-referral stage: Providing informal counselling and discussing prognosis
Grouped barriers	TDF domain	Exemplar quotes	Intuitive enablers	Exemplar quotes	Hypothetical enablers	Exemplar quotes
Effects on the family	Beliefs about consequences	I think the only thing is with those types of conversations, a lot of people tend to focus on the negative, so what [they] can’t do, what’s not going to be possible, and I know that can be quite challenging for families and that it can be quite disheartening. (P5)	Capacity to obtain support from other HCPs	This is where I’d want to link in with the psychologist and the social worker, so the family has that support like, you know, working out what it means for their family and how they’re going to live. (P8)
		My experience is that [the family is] having to wait a good two or three years to get the answers which, seeing them in that condition, and the effect it has on families, is really quite heartbreaking, you would hope that it could be easier in the future. (P9)	Perception of benefits of genetic diagnosis for children and families	I think for Luke, it really depends on how his parents find this information, and if that's going to change how they approach future pregnancies, or how they can kind of, mobilise to organise supports for him. (P7)	Genetic counselling support for SLPs	So, a lot of times, if it gets to that point, which hasn't happened very much thankfully, but I'll be tapping into finding services or maybe even, probably in this case, I'd be going back to the genetics service and seeing if they have counselling available for the families, and helping them work through it. (P5)
		Sometimes, you know, it’s just, this is what it is, but we don’t actually know what that means, kind of diagnosis. I think that’s tricky for families, because they don’t have a name for it or necessarily know there’s, you know, however many cases, other cases like this, and this is what we’re expecting. (P11)		So, definitely, you know, if mum and dad are younger, and they're going to plan to have more children, if there's something that you think that there might be implications of comorbidities that might go with that genetic disorder that people need to be aware of, those are probably the two biggest things that I would consider. (P9)
SLPs' role in genetic and genomic practice	Social/Professional identity and role		Clear boundaries about SLPs' scope of practice in genetics and genomics	I think our role as clinicians is very much being a sounding board, and a listening board, and to try and point people in the right direction, rather than doing the counselling side of things. (P9)	No hypothetical enablers identified
		I usually push the parents back to their like, either genetic health professional or, you know, their paediatrician or whoever they’re seeing who is a bit better placed to have that discussion with them. (P7)	Speech-language pathology as a soft entry point	I would not be working if speech pathologists didn’t fit into this. So, we are the soft entry. We are the ones that people come to because we’re not a geneticist, we’re not a paediatrician, we’re not a psychologist, we’re not checking for IQ. And families are sometimes, I think a little surprised at our general knowledge, and maybe they don’t even understand what communication really is all about…
		Yeah, more of the sort of, clinical genetics types of questions that I would have hoped, yeah, that I would feel aren’t my, are not in my scope. (P12)	Relationship with families	When you've been working with the family for that whole journey and sometimes you are the person that they want to debrief, download, that sort of stuff, and you can often reflect on experiences of other families, anonymously obviously, not giving details, but just acknowledging that the feelings that [the family is] having, you know, I've heard that from other families before, you're not alone. …
Perception of genetics and genomics as a specialised field in speech-language pathology practice	Social/Professional identity and role, Skills	But [genetics] is [academic speech-language pathologists’] area of specialty, and you can’t, this is not something to just get too over-confident about. Maybe that’s why it’s not mainstream. (P2)			Increased exposure to genetics in speech-language pathology specific spaces	I think a spotlight thing on [genetics], with the podcast, like with [podcast] I think is really good, because they often have kind of alternative, like I was just listening to one the other day about being an intermediary speech pathologist. Like, they sort of look at those alternative things within speech pathology. (P1)
		I think it’s a difficult one to decide, if [discussing prognosis and providing counselling] would be difficult to have it as a core role for a therapist. (P9)	No intuitive enablers identified		Specialist SLPs embedded in clinical genetics teams	If there were speech pathologists attached to the genetics team who could, like their role was specifically to talk to families about the impact of that genetic condition on communication outcomes, and if that speech pathologist could kind of be the conduit and link, and make sure that they’re linked in with local services. If I, as a speech pathologist have questions like, I've kind of got someo…
		If you are a speech pathologist working in the community, and you see all sorts of presentations of children, that’s going to happen way less, in fact, you may not see those kinds of presentations at all, because they tend to go to more specialised speech pathologists or roles. (P11)
SLPs' knowledge and understanding of genetics, genomics, and genomic healthcare	Knowledge		Capacity to obtain support from other HCPs	I would probably also speak with the paediatricians and see, you know, what they know about that particular genetic change. (P10)	Genetic counselling support for SLPs	Hopefully I'd be able to work a bit more closely with the genetic counsellors to ask some of my own questions, so that I'm able to answer questions that the family have as well. (P5)
			Experience with specialist areas of practice including genetics	I think that's an area where I feel like I have a little bit more knowledge with the conditions like, the people that have conditions that I work with, like, I'd be able to speak about that. (P8)		I think perhaps if I'd had a conversation with, I don't know how connected the genetics services are to the local families, I don't know if they do, sort of, handover calls, or reports, or things like that. I feel like perhaps if I had a phone call, if that was possible, or a part of the practice, would be really helpful to learn more directly from the genetics team, and maybe an offer to answer …
		A lack of prior knowledge about genetics if I’m honest, from our course, we didn’t really cover it that much either. (P1)	Research skills and access to scientific literature	I'm quite happy with those established conditions to say, yeah, this is what we know, this is what I know from my clinical practice in terms of speech pathology, and this is what we know in terms of the research into your child's condition to say this is what the future may look like. (P7)
		I don’t think you can [provide counselling] without being properly trained. (P2)	Training/education	And I probably wouldn't have known before I had just a basic education of what it means to have a chromosome deletion, and then what would you look for further to see how it would actually impact on your practice. Because, okay, there's a chromosome deletion, encompassing 112 genes, so what? (P12)	Training through tertiary degrees or genetics services	I think as long as you knew what you're doing, and you had appropriate training, [discussing genetics] would be okay. I suppose it’s like anything, so, you know, it's like, I’ve done extra training on how to scope somebody, but I wouldn’t have been just like, as a regular speech pathologist doing that. (P3)
		I’m kind of comfortable with yes, lots of genetic conditions can have speech and language delays as a result, but anything sort of more detailed than that, I’d definitely be wanting to be like, I’ll get back to you on that one. (P4)	Exposure to genetics through particular practice settings or research	I’ve certainly had roles where I've had to understand and know a lot more about [genetics] than other positions, like, for a while I was doing the cleft lip and palate role at the hospital, and a lot of the children had associated genetic or chromosomal deletions, which was part of, their cleft was part of that. So, sometimes roles like that, kind of, lean themselves more into that. (P11)		I would like to see more of that general counselling stuff coming through in the [speech-language pathology university] courses. (P11)
			Liasing with other SLPs	So, I’m a sole clinician where I work, but I've got a lot of [speech pathologists] in my network, and I'd probably be putting it out to them and going, hey, has anyone else ever worked with this condition, you know, what insights have you got for me? (P4)
Genomics as a constantly evolving field	Environmental context and resources, Knowledge	And then other conditions where it's not, or, you know, a new diagnosis or something that's really rare, where we don't have a great body of work to say, this is what this will look like. (P7)	Access to specialist services or experts in the field	I mean I know [speech pathologists] work in genetics, so I might reach out and and be like, can you tell me if this is appropriate to provide to a family? (P8)	Increased exposure to genetics in speech-language pathology specific spaces	Definitely in health, [genetics is] discussed more, and I definitely think that that's true, in the last five years, it's something that is part of the routine discussion that happens, whereas before, five years ago, I don't think it was. (P9)
		[Genetics is] such a changing area, trying to find out, you know, when a condition comes along, I mean, most of the [genetic] conditions that we get a diagnosis for now … are a one-off that we’ve never heard of before, so it’s always an ever-changing field, really. (P9)				I think that, that as information about particular disorders trickles through, then some more professional development and upskilling of speech pathologists just to clarify, what is our remit in this area? And, you know, things like our national body putting out position statements et cetera would be helpful. (P10)
SLPs' emotional response to genomic healthcare	Emotion	I think [a colleague] feels, just seeing how overwhelmed [the colleague has] gotten, makes me also think I would not want that role to intrude into my role as a speech pathologist. (P1)	Capacity to obtain support from other HCPs	[Speech-language pathologist has] sought out counselling herself in terms of knowing how to deal with these conversations and deal with the heavy content. (P1)	Genetic counselling support for SLPs	Even if the genetic counsellor can provide me with the counselling, you know, counsel the family, but also counsel me in working with this. (P1)
