# Supplementary material
Source: publisher figshare collection journal article supplement (https://asha.figshare.com/articles/dataset/_/24112800)
Supplement: Supplementary file 1 [file 2]

### Supplemental Material S3. TDF domains in context.

| <b><i>TDF domain</i></b>                 | <b><i>TDF domain definition<br/>(Cane et al. 2012)</i></b>                                                                                                                            | <b><i>Definition in context</i></b>                                                                                                                                                                                                                                                                                        |
|------------------------------------------|---------------------------------------------------------------------------------------------------------------------------------------------------------------------------------------|----------------------------------------------------------------------------------------------------------------------------------------------------------------------------------------------------------------------------------------------------------------------------------------------------------------------------|
| Knowledge                                | An awareness of the existence of something                                                                                                                                            | SLPs' actual awareness and understanding (through education/training) of the principles and process of considering incorporation of genetics and genomics in speech-language pathology clinical practice                                                                                                                   |
| Skills                                   | An ability or proficiency acquired through practice                                                                                                                                   | SLPs' actual physical and psychological ability or proficiency acquired through actual practice and experience to make decisions whether or not to consider incorporation of genetics and genomics in speech-language pathology practice                                                                                   |
| Memory, Attention and Decision Processes | The ability to retain information focus selectively on aspects of the environment and choose between two or more alternatives                                                         | SLPs' ability to remember to consider incorporation of genetics and genomics alongside other processes for diagnosis, intervention, and therapy                                                                                                                                                                            |
| Behavioral Regulation                    | Anything aimed at managing or changing objectively observed or measured actions                                                                                                       | SLPs' self-created or self-imposed regulation to help make decisions about considering incorporation of genetics and genomics in speech-language pathology practice                                                                                                                                                        |
| Social Influences                        | Those interpersonal processes that can cause individuals to change their thoughts, feelings, or behaviors                                                                             | Interpersonal interactions between SLPs and other healthcare professionals or clients, that can influence SLPs' thoughts, feelings, or behaviors regarding considering incorporation of genetics and genomics                                                                                                              |
| Environmental Context and Resources      | Any circumstance of a person's situation or environment that discourages or encourages the development of skills and abilities independence, social competence, and adaptive behavior | Any external circumstance of a SLPs' situation or environment that SLPs consider discourages or encourages them to consider incorporation of genetics and genomics in practice, including impacting the development of capability, motivation, or social opportunity to considering incorporation of genetics and genomics |

|                                       |                                                                                                                                                                           |                                                                                                                                                                                                                                                                                    |
|---------------------------------------|---------------------------------------------------------------------------------------------------------------------------------------------------------------------------|------------------------------------------------------------------------------------------------------------------------------------------------------------------------------------------------------------------------------------------------------------------------------------|
| Social/Professional Role and Identity | A coherent set of behaviors and displayed personal qualities of an individual in a social or work setting                                                                 | SLPs' perceived professional role and identity in relation to considering incorporation of genetics and genomics                                                                                                                                                                   |
| Beliefs about Capabilities            | Acceptance of the truth, reality, or validity about at ability, talent, or facility that a person can put to constructive use                                             | SLPs' perception about their own capability to consider incorporation of genetics and genomics in clinical practice (terms used in literature: confidence, comfort)                                                                                                                |
| Optimism                              | The confidence that things will happen for the best or that desired goals will be attained                                                                                | SLPs' optimism or pessimism around considering the incorporation of genetics and genomics in speech-language pathology clinical practice                                                                                                                                           |
| Beliefs about Consequences            | Acceptance of the truth, reality, or validity about outcomes of a behavior in a given situation                                                                           | SLPs' perceptions about the value of considering incorporation of genetics and genomics in clinical practice—whether it is worthwhile in that it will improve patient or family outcomes in their own practice, or contribute to the improvement of patient care more holistically |
| Intentions                            | A conscious decision to perform a behavior or a resolve to act in a certain way                                                                                           | SLPs' intentions to consider incorporation of genetics and genomics in clinical practice                                                                                                                                                                                           |
| Goals                                 | Mental representations of outcomes or end states that an individual wants to achieve                                                                                      | Whether considering incorporation of genetics and genomics is a priority within SLPs' clinical practice                                                                                                                                                                            |
| Reinforcement                         | Increasing the probability of a response by arranging a dependent relationship, or contingency, between the response and a given stimulus                                 | Incentives, rewards, sanctions, reinforcement at any level (eg patient satisfaction; better client health; economic incentives) that encourage or increase SLPs' decisions to consider incorporation of genetics and genomics in clinical practice                                 |
| Emotion                               | A complex reaction pattern, involving experiential, behavioral, and physiological elements, by which the individual attempts to deal with a personally significant matter | SLPs' feelings related to considering incorporation of genetics and genomics in their clinical practice                                                                                                                                                                            |

**Note:** TDF domain definitions included from: Cane, J., O'Connor, D., & Michie, S. (2012). Validation of the theoretical domains framework for use in behaviour change and implementation research. *Implementation Science*, 7, 37. <https://doi.org/10.1186/1748-5908-7-37>. Reprinted under the Creative Commons Attribution license (<http://creativecommons.org/licenses/by/2.0>). Definitions in context adapted from: Best, S., Long, J.C., Gaff, C., Braithwaite, J., & Taylor, N. (2021). Investigating the adoption of clinical genomics in Australia: An implementation science case study. *Genes*, 12(2), 317. <https://doi.org/10.3390/genes12020317>. [Reprinted under the Creative Commons Attribution license \(http://creativecommons.org/licenses/by/2.0\)](http://creativecommons.org/licenses/by/2.0).

SLP = speech-language pathologist; TDF = Theoretical Domains Framework.
