# Supplementary material
Source: publisher figshare collection journal article supplement (https://asha.figshare.com/articles/dataset/_/24112800)
Supplement: Supplementary file 2 [file 2]

## **Supplemental Material S1. Clinical vignette.**

*During the interview, participants were presented with the case of Luke, a boy who had been referred for speech-language pathology support. This vignette was utilized to frame the interview.*

Throughout our interview, we are going to focus on Luke, a 5-year-old boy who has been referred to your speech-language pathology service. His parents, Emma and Brian, are concerned about Luke's speech and language development.

### **PART ONE**

Luke is a 5-year-old boy who has been referred to your service. His parents, Emma and Brian, tell you that Luke's language seems to be behind other children his age, and he had delayed developmental milestones. Upon formal language assessment, you find he has expressive and receptive language impairment, across semantics, syntax, and morphology. Luke is also found to have speech sound impairment upon formal speech assessment, characterized by phonological disorder and childhood apraxia of speech.

Emma and Brian are also concerned about Luke's learning, as his teachers have reported he has difficulty with reading and writing at school. Luke's hearing has been tested and is within the normal range for speech and language development.

### **PART TWO**

Through engagement with an external supervisor, the supervisor has suggested that Luke's presentation would warrant further investigation through a clinical genetics service. Luke's parents are both open to this.

### **PART THREE**

After Luke was referred to a clinical genetics service, the genetics healthcare professionals recommended that Luke have genetic testing. Two months passed, and Luke's family had another appointment with the genetics service to receive his testing results. Luke was found to have a genetic change called 16p11.2 deletion. This refers to there being a missing part of genetic information, or DNA, of chromosome 16.

Luke's family continues to attend your service for speech-language pathology support. Emma and Brian feel concerned about Luke's diagnosis and express their concerns to you—they are worried about his prognosis, and what his diagnosis means for their family.
